# Supplementary material for: Development of a PANI/Fe(NO3)2 nanomaterial for reactive orange 16 (RO16) dye removal
Source: Royal Society of Chemistry journal article supplement (doi:10.1039/d1ay01402a), 2021-01-01
Supplement: d1ay01402a1.pdf [file d1ay01402a1.pdf]

## Supplementary Information

### Development of PANI/ Fe(NO<sub>3</sub>)<sub>2</sub> Nanomaterial for Reactive Orange 16 (RO16) Dye Removal

**Tanvir Arfin<sup>1,\*</sup>, Dipti A. Bhisare, and S.S Waghmare**

Environmental Materials Division, CSIR-National Environmental Engineering Research Institute (CSIR-NEERI), Nehru Marg, Nagpur-440020  
India.

---

\*Corresponding author.

*E-mail address:* tanvirarfin@ymail.com

<sup>1</sup>Current address: Hyderabad Zonal Centre, CSIR-National Environmental Engineering  
Research Institute (NEERI), IICT Campus, Tarnaka, Hyderabad, Telangana, 500007, India

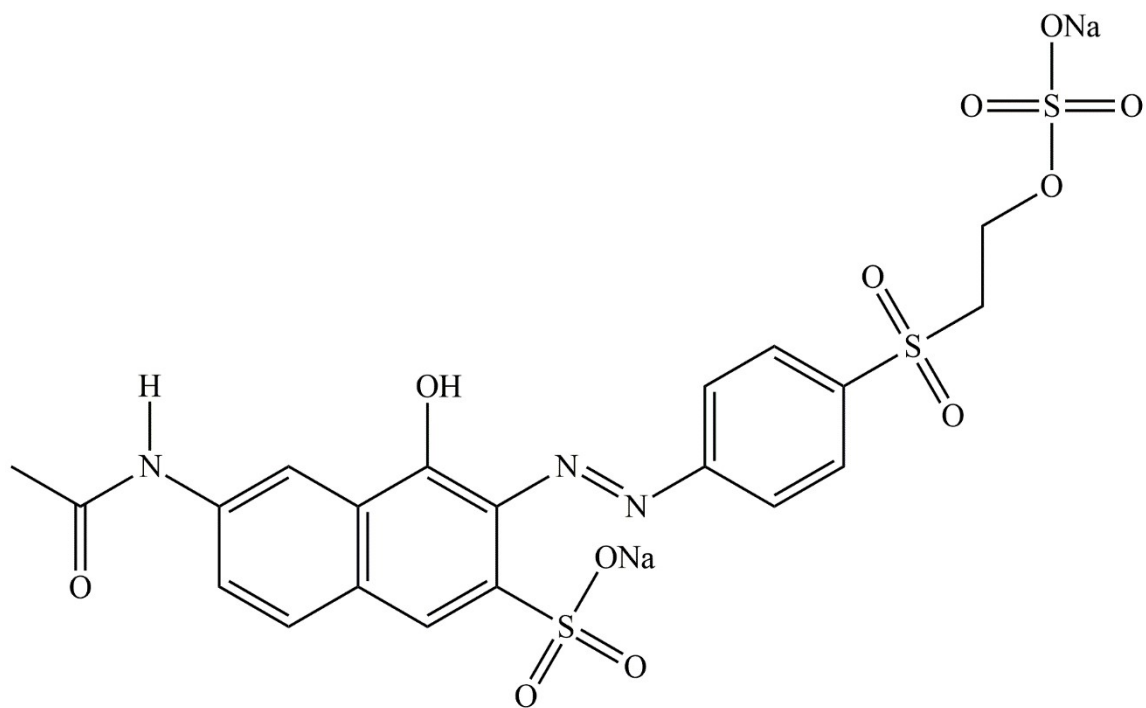

Fig. S1 Molecular structure of RO16

Table S1: General characteristics of RO16 dye

| Characteristics             | Description                                                                                                      |
|-----------------------------|------------------------------------------------------------------------------------------------------------------|
| IUPAC Name                  | disodium (3Z)-6-acetamido-4-oxo-3-[[4-(2-sulfonatoxyethylsulfonyl)phenyl]hydrazinylidene]naphthalene-2-sulfonate |
| Common Name                 | Remazol brilliant orange 3R                                                                                      |
| CAS number                  | 12225-83-1                                                                                                       |
| Color index number          | 17757                                                                                                            |
| Ionization                  | Reactive                                                                                                         |
| $\lambda_{\text{max}}$ (nm) | 494 nm                                                                                                           |
| Molecular weight (g/mol)    | 617.54                                                                                                           |
| Dye content                 | $\geq 70\%$                                                                                                      |
| Chemical formula            | $\text{C}_{20}\text{H}_{17}\text{N}_3\text{Na}_2\text{O}_{11}\text{S}_3$                                         |
| H-Bond Donor                | 2                                                                                                                |
| H-Bond Acceptor             | 13                                                                                                               |

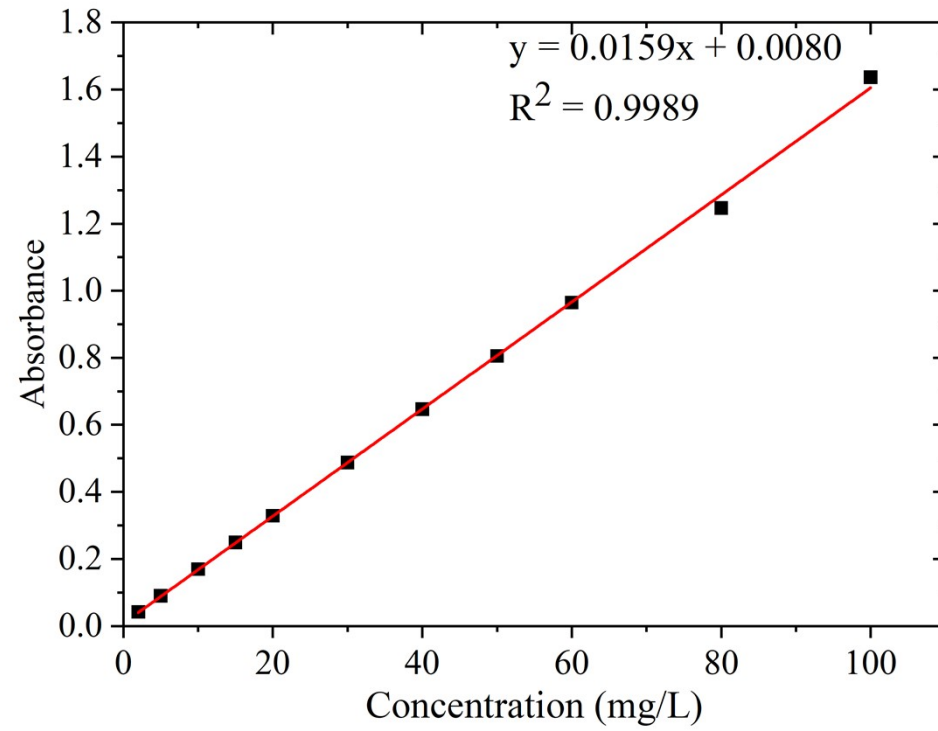

Fig.S2. Calibration curve of absorbance against concentration of RO16 dye

Table S2: Linear and non-linear isotherm equation

| Type                                         | Linear Form                                                                             | Plot                                | Ref. |
|----------------------------------------------|-----------------------------------------------------------------------------------------|-------------------------------------|------|
| Langmuir –I (Hanes-Woolf Linearization)      | $\frac{C_e}{q_e} = \frac{1}{q_m} C_e + \frac{1}{K_L q_m}$                               | $\frac{C_e}{q_e}$ vs. $C_e$         | 1    |
| Langmuir –II (Lineweaver-Burk Linearization) | $\frac{1}{q_e} = \frac{1}{q_m} + \frac{1}{q_m K_L} \times \frac{1}{C_e}$                | $\frac{1}{q_e}$ vs. $\frac{1}{C_e}$ | 1    |
| Langmuir – III (Eadie-Hoffsee Linearization) | $q_e = q_m - \frac{1}{K_L} \times \frac{q_e}{C_e}$                                      | $q_e$ vs. $\frac{q_e}{C_e}$         | 1    |
| Langmuir –IV (Scatchard Linearization)       | $\frac{q_e}{C_e} = q_m K_L - K_L q_e$                                                   | $\frac{q_e}{C_e}$ vs. $q_e$         | 1    |
| Langmuir - V                                 | $\frac{1}{C_e} = q_m K_L \times \frac{1}{q_e} - K_L$                                    | $\frac{1}{C_e}$ vs. $\frac{1}{q_e}$ | 1    |
| Langmuir-VI                                  | $C_e = q_m \times \frac{C_e}{q_e} - \frac{1}{K_L}$                                      | $C_e$ vs. $\frac{C_e}{q_e}$         | 1    |
| Freundlich                                   | $\log q_e = \log K_F + \frac{1}{n} \log C_e$                                            | $\log q_e$ vs. $\log C_e$           | 2    |
| Temkin                                       | $q_e = \frac{RT}{b_T} \ln A_T + \left( \frac{RT}{b_T} \right) \ln C_e$                  | $q_e$ vs. $\ln C_e$                 | 2    |
| Dubinin-Radushkevich                         | $\ln q_e = \ln q_{DR} - K_{DR} \varepsilon^2$                                           | $\ln q_e$ vs. $\varepsilon^2$       | 2    |
| Harkins-Jura                                 | $\frac{1}{q_e^2} = \frac{B_H}{A_H} - \left( \frac{1}{A_H} \right) \log C_e$             | $\frac{1}{q_e^2}$ vs. $\log C_e$    | 2    |
| Halsey                                       | $\ln q_e = \left( \frac{1}{n_H} \right) \ln K_H - \left( \frac{1}{n_H} \right) \ln C_e$ | $\ln q_e$ vs. $\ln C_e$             | 2    |

|                  |                                                                                  |                                                 |   |
|------------------|----------------------------------------------------------------------------------|-------------------------------------------------|---|
| Elovich          | $\ln\left(\frac{q_e}{C_e}\right) = \ln(K_E)(q_m) - \left(\frac{q_e}{q_m}\right)$ | $\ln\left(\frac{q_e}{C_e}\right)$ vs. $q_e$     | 2 |
| Jovanovic        | $\ln q_e = \ln q_m - k_J C_e$                                                    | $\ln q_e$ vs. $C_e$                             | 2 |
| Redlich-Peterson | $\ln\left(\frac{C_e}{q_e}\right) = \beta \ln C_e - \ln A$                        | $\ln\left(\frac{C_e}{q_e}\right)$ vs. $\ln C_e$ | 2 |
| Jossens          | $\ln\left(\frac{C_e}{q_e}\right) = -\ln H + Fq_e^p$                              | $\ln\left(\frac{C_e}{q_e}\right)$ vs. $q_e^p$   | 2 |

---

Table S3: List of error functions

| Error functions                           | Abbreviations | Models                                                                                                                                                               | Ref. |
|-------------------------------------------|---------------|----------------------------------------------------------------------------------------------------------------------------------------------------------------------|------|
| Nonlinear chi-square test                 | $\chi^2$      | $\chi^2 = \sum_{i=1}^n \frac{(q_{e,\text{exp}} - q_{e,\text{cal}})^2}{q_{e,\text{exp}}}$                                                                             | 3    |
| Sum of squares of the errors              | SSE/ ERRSQ    | $SSE = \sum_{i=1}^n (q_{e,\text{exp}} - q_{e,\text{cal}})^2$                                                                                                         | 3    |
| Average relative error                    | ARE           | $ARE = \frac{100}{n} \sum_{i=1}^n \left  \frac{q_{e,\text{exp}} - q_{e,\text{cal}}}{q_{e,\text{exp}}} \right $                                                       | 3    |
| Residual root mean square error           | RMSE          | $RMSE = \sqrt{\frac{1}{n-2} \sum_{i=1}^n (q_{e,\text{exp}} - q_{e,\text{cal}})^2}$                                                                                   | 4    |
| Coefficient of determination              | $R^2$         | $R^2 = \frac{\sum (q_{e,\text{exp}} - \bar{q}_{e,\text{cal}})^2}{\sum (q_{e,\text{exp}} - \bar{q}_{e,\text{cal}})^2 + \sum (q_{e,\text{exp}} - q_{e,\text{cal}})^2}$ | 3    |
| Standard deviation of relative errors     | SRE           | $S_{RE} = \sqrt{\frac{\sum_{i=1}^n [(q_{e,\text{exp}} - q_{e,\text{cal}}) - ARE]^2}{n-1}}$                                                                           | 3    |
| Marquardt's percentage standard deviation | MPSD          | $MPSD = 100 \sqrt{\frac{1}{n-p} \sum_{i=1}^n \left( \frac{q_{e,\text{exp}} - q_{e,\text{cal}}}{q_{e,\text{exp}}} \right)^2}$                                         | 3    |
| Normalized standard deviation             | NSD           | $NSD = \Delta q(\%) = 100 \sqrt{\frac{1}{n-1} \sum_{i=1}^n \left( \frac{q_{e,\text{exp}} - q_{e,\text{cal}}}{q_{e,\text{exp}}} \right)^2}$                           | 5    |

|                                 |        |                                                                                                                          |   |
|---------------------------------|--------|--------------------------------------------------------------------------------------------------------------------------|---|
| Hybrid functional error         | HYBRID | $HYBRID = \frac{100}{(n-p)} \sum_{i=1}^n \frac{(q_{e,\text{exp}} - q_{e,\text{cal}})}{q_{e,\text{exp}}}$                 | 3 |
| Average absolute error          | EABS   | $EABS = \frac{1}{n} \sum_{i=1}^n  q_{e,\text{exp}} - q_{e,\text{cal}} $                                                  | 3 |
| Sum of the absolute error       | SAE    | $SAE = \sum_{i=1}^n  q_{e,\text{exp}} - q_{e,\text{cal}} $                                                               | 4 |
| Average relative standard error | ARSE   | $ARSE = \sqrt{\frac{1}{n-1} \sum_{i=1}^n \left( \frac{q_{e,\text{exp}} - q_{e,\text{cal}}}{q_{e,\text{exp}}} \right)^2}$ | 4 |

---

$q_{e,\text{exp}}$  ( $\text{mg g}^{-1}$ ): Value obtained from the experiment,  $q_{e,\text{cal}}$  ( $\text{mg g}^{-1}$ ): Calculated value from the isotherm for corresponding,  $q_{e,\text{exp}} \bar{q}_{\text{cal}}$  ( $\text{mg g}^{-1}$ ): Mean of  $q_{e,\text{cal}}$ , n: Number of experiment



Table S4: Kinetics models of adsorption

| Type                         | Linear Form                                                                                             | Plot                                                  | Ref. |
|------------------------------|---------------------------------------------------------------------------------------------------------|-------------------------------------------------------|------|
| Pseudo-first order           | $\ln(q_e - q_t) = \ln(q_e) - k_1 t$                                                                     | $\ln(q_e - q_t) \text{ vs. } t$                       | 6    |
| Type-I pseudo-second order   | $\frac{t}{q_t} = \left(\frac{1}{q_e}\right)t + \left(\frac{1}{k_2 q_e^2}\right)$                        | $\frac{t}{q_t} \text{ vs. } t$                        | 6    |
| Type-II pseudo-second order  | $\frac{1}{q_t} = \left(\frac{1}{k_2 q_e^2}\right)\left(\frac{1}{t}\right) + \left(\frac{1}{q_e}\right)$ | $\frac{1}{q_t} \text{ vs. } \frac{1}{t}$              | 6    |
| Type-III pseudo-second order | $q_t = -\left(\frac{1}{k_2 q_e}\right)\left(\frac{q_t}{t}\right) + q_e$                                 | $q_t \text{ vs. } \frac{q_t}{t}$                      | 6    |
| Type-IV pseudo-second order  | $\frac{q_t}{t} = -k_2 q_e q_t + k_2 q_e^2$                                                              | $\frac{q_t}{t} \text{ vs. } q_t$                      | 6    |
| Type-V pseudo-second order   | $\frac{1}{t} = k_2 q_e^2 \left(\frac{1}{q_t}\right) - k_2 q_e^2 \left(\frac{1}{q_e}\right)$             | $\frac{1}{t} \text{ vs. } \left(\frac{1}{q_t}\right)$ | 6    |

|                                       |                                                                                                                               |                                                                                       |   |
|---------------------------------------|-------------------------------------------------------------------------------------------------------------------------------|---------------------------------------------------------------------------------------|---|
| Type-VI<br>pseudo-<br>second<br>order | $\frac{1}{q_e - q_t} = \frac{1}{q_e} + k_2 t$                                                                                 | $\frac{1}{q_e - q_t} \text{ vs. } t$                                                  | 6 |
| Intra-<br>particle<br>diffusion       | $q_t = k_i \sqrt{t} + C_i$                                                                                                    | $q_t \text{ vs. } \sqrt{t}$                                                           | 7 |
| Elovich                               | $q_t = A + B \ln t$                                                                                                           | $q_t \text{ vs. } \ln t$                                                              | 7 |
| Bangham                               | $\log \left[ \log \left( \frac{C_0}{C_0 - q_t m} \right) \right] = \log \left( \frac{k_0 m}{2.303 V} \right) + \sigma \log t$ | $\log \left[ \log \left( \frac{C_0}{C_0 - q_t m} \right) \right] \text{ vs. } \log t$ | 7 |
| Boyd                                  | $B_t = -0.4977 - \ln \left( 1 - \frac{q_t}{q_e} \right)$                                                                      | $B_t \text{ vs. } t$                                                                  | 7 |

---

### Study of adsorption thermodynamics

During environmental engineering, entropy and energy are considered adequately for accurately determining the continuous process occurring rapidly. The thermodynamic studies are sufficiently taken into account for scientifically investigating the adsorption process's economic feasibility and accurately estimating exothermic and endothermic nature. Excellent result of thermodynamic parameters acts as a critical indicator for practical use.

Table S5: Thermodynamic relationship for the adsorption of RO16 onto PANI/Fe(NO<sub>3</sub>)<sub>2</sub>

|                         |                                                                                                 |      |
|-------------------------|-------------------------------------------------------------------------------------------------|------|
| Thermodynamic relations | $\ln K_D = \frac{\Delta S^\circ}{R} + \frac{-\Delta H^\circ}{RT} \text{ (Van't Hoff equation)}$ | (7)  |
|                         | $K_D = \frac{q_e}{C_e}$                                                                         | (8)  |
|                         | $\Delta G^\circ = \Delta H^\circ - T\Delta S^\circ$                                             | (9)  |
|                         | $\Delta G^\circ = -RT \ln K_D$                                                                  | (10) |



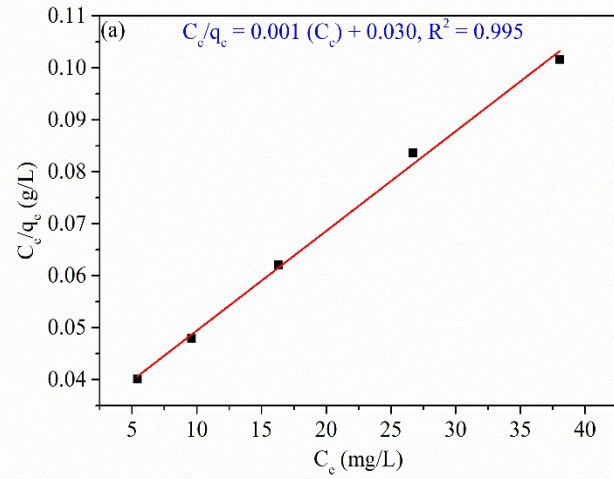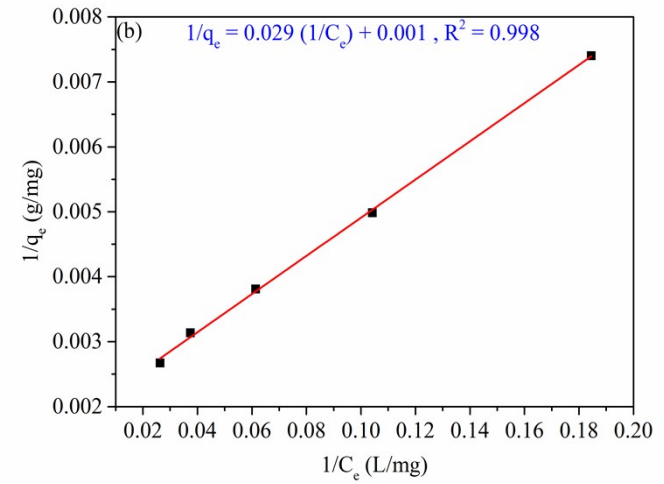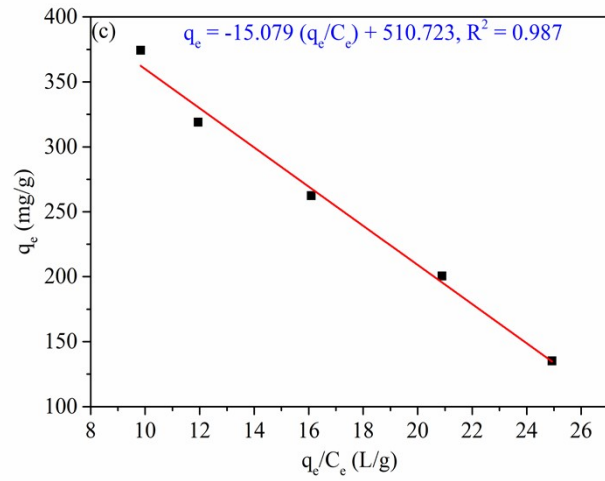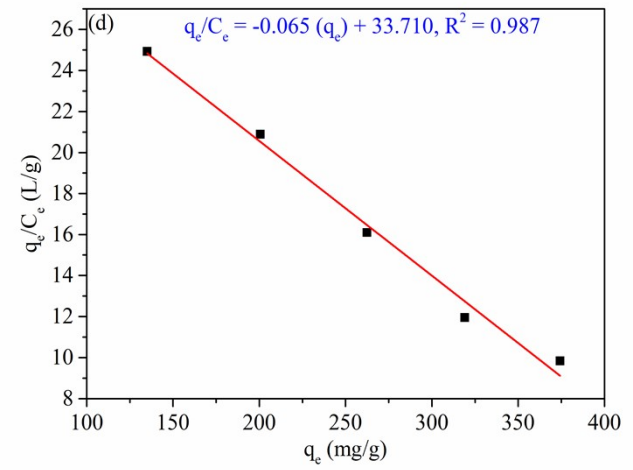

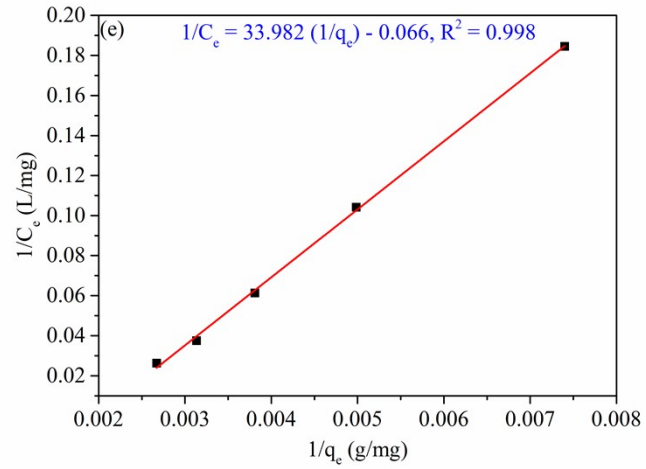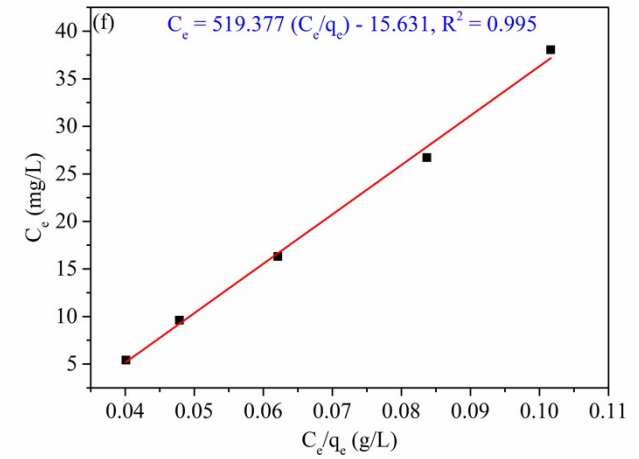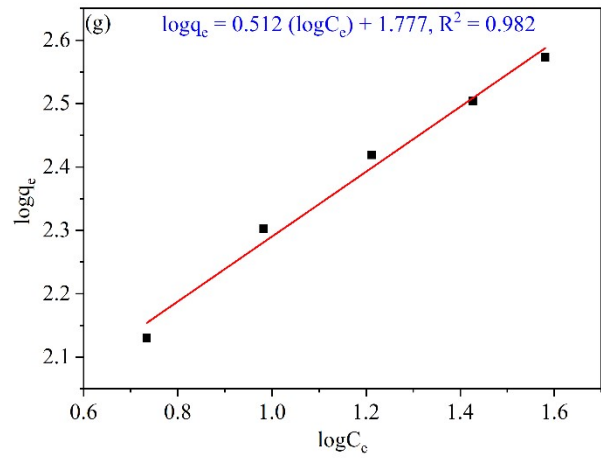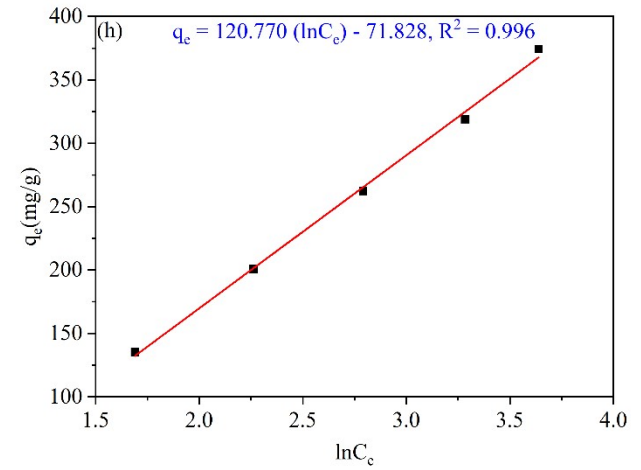

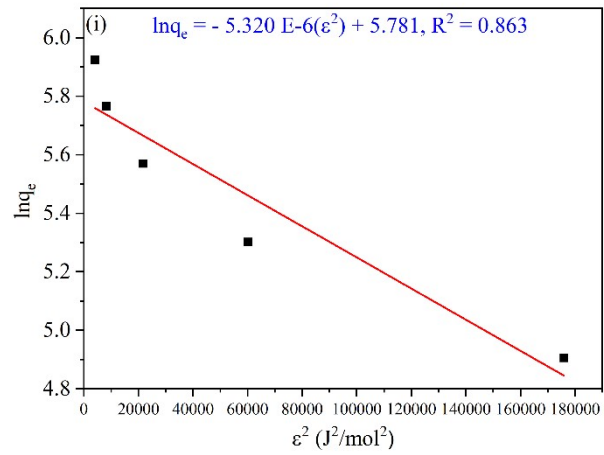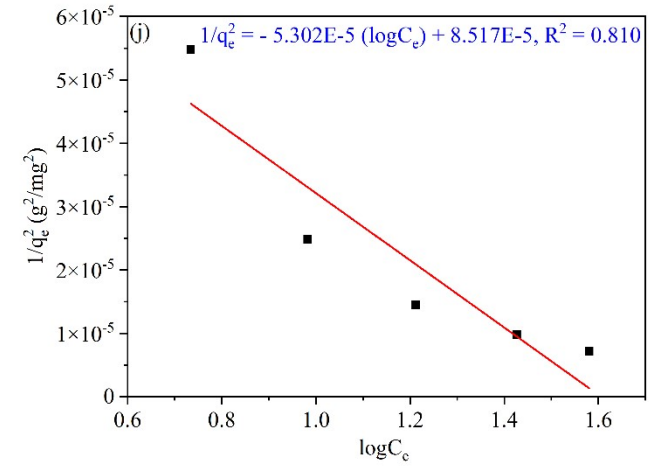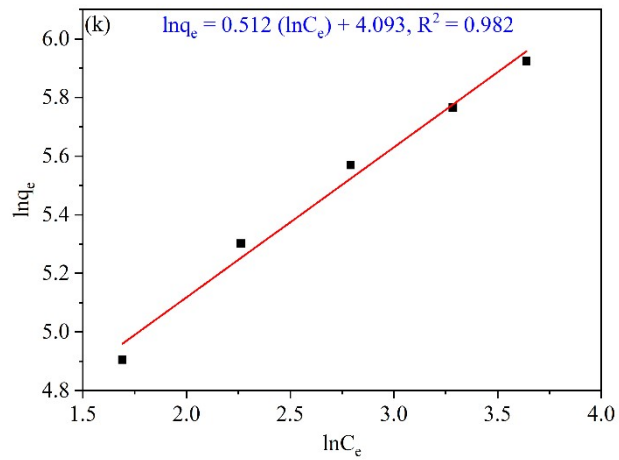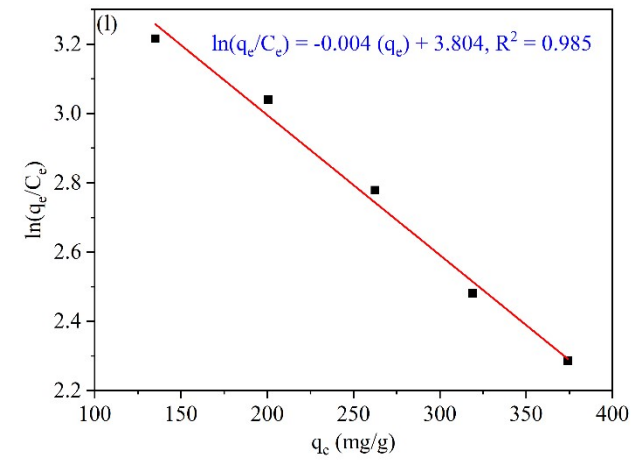

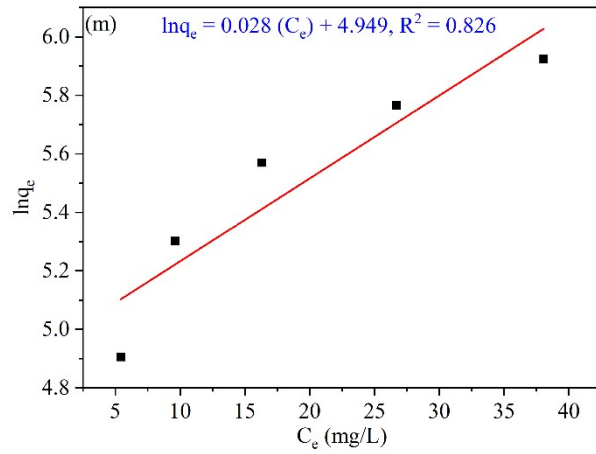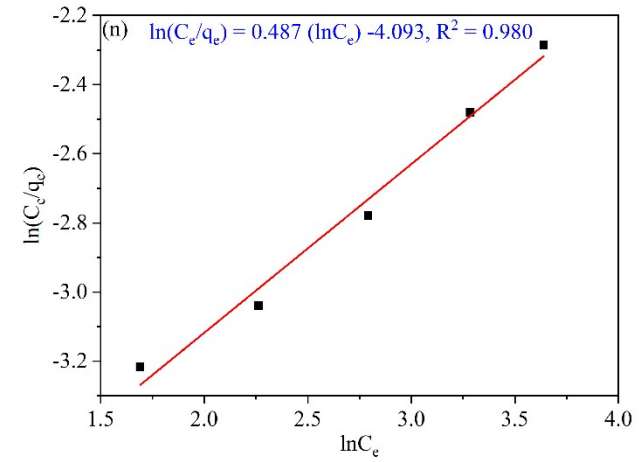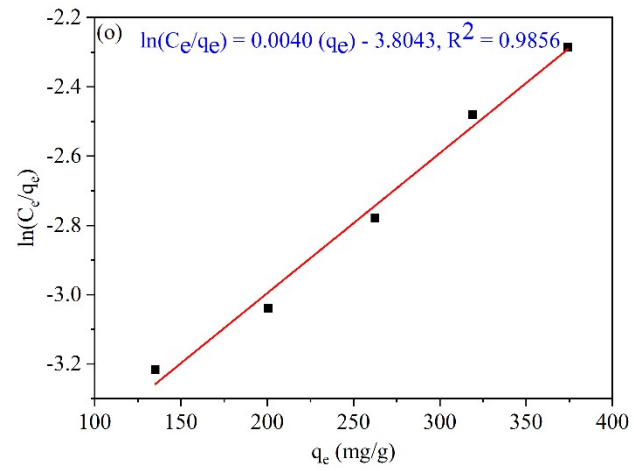



Fig.S3 Adsorption isotherms for the adsorption of dyes on: PANI/ Fe(NO<sub>3</sub>)<sub>2</sub> (a) Langmuir –I, (b) Langmuir –II, (c) Langmuir –III, (d) Langmuir –IV, (e) Langmuir –V, (f) Langmuir –VI, (g) Freundlich, (h) Temkin, (i) Dubinin-Radushkevich, (j) Harkins-Jura, (k) Halsey, (l) Elovich, (m) Jovanovich, (n) Redlich-Peterson, (o) Jossens. Reaction conditions: (the initial concentration, contact time, pH, volume of solution, amount of adsorbent and temperature was 100 mg/L, 80 min, 4, 100 mL, 70 mg and 298K respectively).

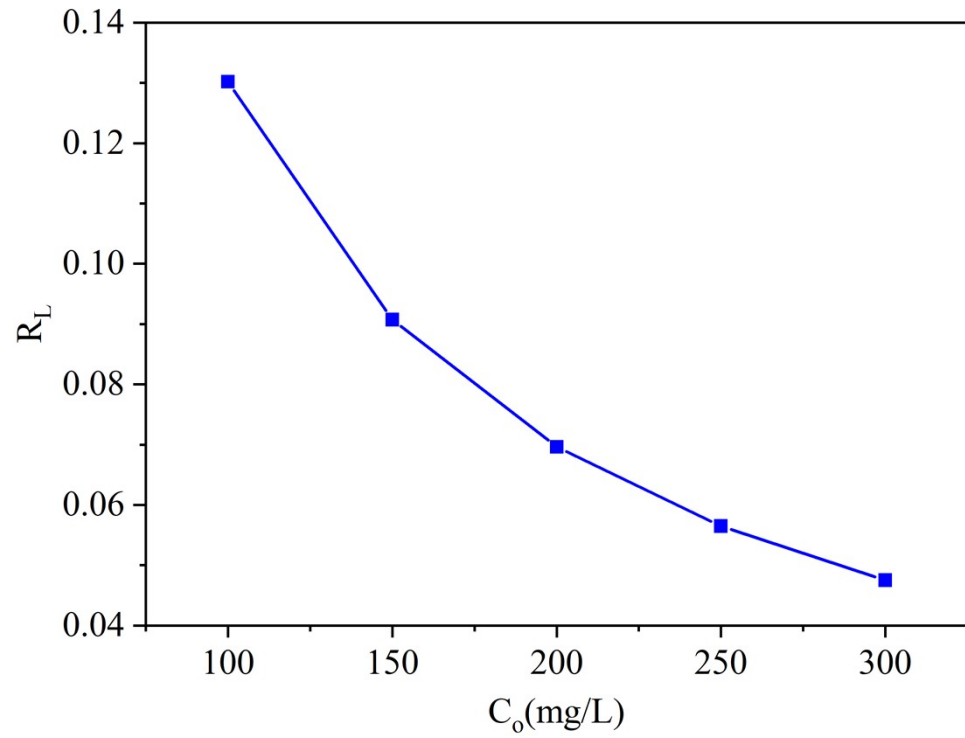

Fig.S4. Effect of initial concentration on the separation factor with: PANI/  $\text{Fe}(\text{NO}_3)_2$  (pH, volume of solution and amount of adsorbent was 4, 100 mL, and 70 mg, respectively).

Table S6: Values of twelve different error analyses of isotherm models for RO16 adsorption onto PANI/ Fe(NO<sub>3</sub>)<sub>2</sub> nanocomposite. Reaction conditions: (the initial concentration, contact time, pH, volume of solution, amount of adsorbent and temperature was 100 mg/L, 80 min, 4, 100 mL, 70 mg and 298K respectively).

| Isotherms                | Error         |           |                |         |           |        |         |           |           |        |        |         |
|--------------------------|---------------|-----------|----------------|---------|-----------|--------|---------|-----------|-----------|--------|--------|---------|
|                          | SSE/<br>ERRSQ | $\chi^2$  | R <sup>2</sup> | ARE     | RMSE      | HYBRID | MPSD    | SAE       | EABS      | ARSE   | SRE    | NSD     |
| Langmuir –I              | 8.619E-06     | 1.07E-04  | 0.9955         | 0.1759  | 1.467E-03 | 0.2199 | 1.9805  | 7E-05     | 1.4E-05   | 0.0190 | 0.0467 | 1.9085  |
| Langmuir –II             | 1.18E-08      | 3.73E-06  | 0.9988         | 0.0642  | 5.431E-05 | 0.0803 | 1.7543  | 8.673E-19 | 1.734E-19 | 0.0175 | 0.0283 | 1.7543  |
| Langmuir –III            | 339.3743      | 1.065     | 0.9877         | 0.0053  | 9.2110    | 0.0067 | 2.9489  | 0.4631    | 0.0926    | 0.0290 | 0.3401 | 2.9489  |
| Langmuir –IV             | 1.4185        | 0.1197    | 0.9877         | 0.1029  | 0.5955    | 0.1286 | 5.1296  | 0.0213    | 0.0042    | 0.0512 | 0.0636 | 5.1296  |
| Langmuir –V              | 1.376E-05     | 0.0003    | 0.9988         | 0.3601  | 0.0018    | 0.4501 | 5.3889  | 0.0001    | 3.2E-05   | 0.0538 | 0.0673 | 5.3889  |
| Langmuir –VI             | 0.0015        | 0.0006    | 0.9955         | 0.0154  | 0.0199    | 0.0193 | 0.8701  | 0.0008    | 0.0001    | 0.0087 | 0.0029 | 0.8701  |
| Freundlich               | 8.611E-06     | 0.0001    | 0.9823         | 0.1759  | 0.0014    | 0.2199 | 1.9805  | 7E-05     | 1.4E-05   | 0.0190 | 0.0467 | 1.9085  |
| Temkin                   | 97.1229       | 0.3259    | 0.9964         | 0.0766  | 4.9275    | 0.0958 | 1.7688  | 0.4435    | 0.0887    | 0.0176 | 0.3344 | 1.7688  |
| Dubinin-<br>Radushkevich | 0.0662        | 0.0119    | 0.8631         | 0.0318  | 0.1286    | 0.0398 | 2.3184  | 0.0018    | 0.0003    | 0.0231 | 0.0291 | 2.3184  |
| Harkins-Jura             | 2.133E-10     | 1.146E-05 | 0.8104         | 4.5932  | 7.303E-06 | 5.7415 | 49.4243 | 8.464E-08 | 1.692E-08 | 0.4942 | 0.2396 | 49.4243 |
| Halsey                   | 0.0084        | 0.0015    | 0.9823         | 0.0155  | 0.0460    | 0.0194 | 0.8700  | 0.0018    | 0.0003    | 0.0087 | 0.0166 | 0.8700  |
| Elovich                  | 0.0063        | 0.0021    | 0.9856         | 0.0149  | 0.0397    | 0.0186 | 1.3737  | 0.0013    | 0.0002    | 0.0137 | 0.0227 | 1.3737  |
| Jovanovic                | 0.0838        | 0.0159    | 0.8264         | 0.07319 | 0.1448    | 0.0914 | 2.7558  | 0.0019    | 0.0003    | 0.0275 | 0.0208 | 2.7558  |
| Redlich-<br>Peterson     | 0.0087        | -0.0030   | 0.9805         | 0.0246  | 0.0466    | 0.0307 | 1.6196  | 0.0018    | 0.0003    | 0.0161 | 0.0119 | 1.6196  |
| Jossens                  | 0.0063        | -0.0021   | 0.9856         | 0.0149  | 0.0397    | 0.0186 | 1.3737  | 0.0013    | 0.0002    | 0.0137 | 0.0120 | 1.3737  |

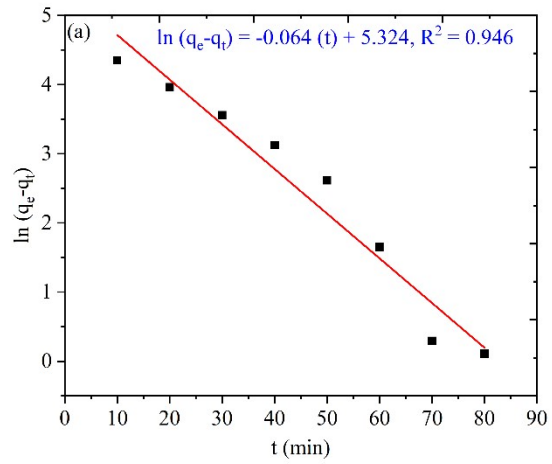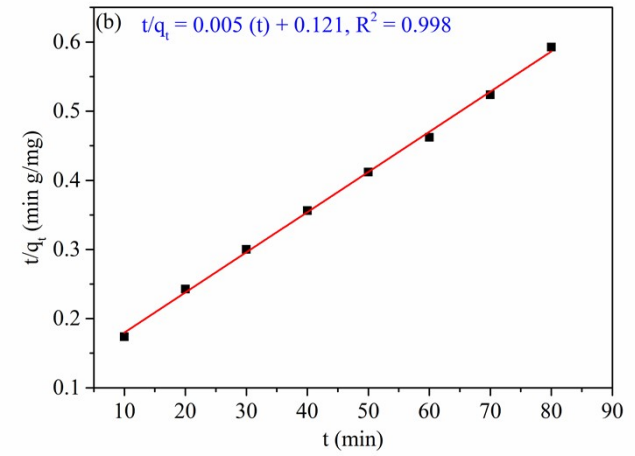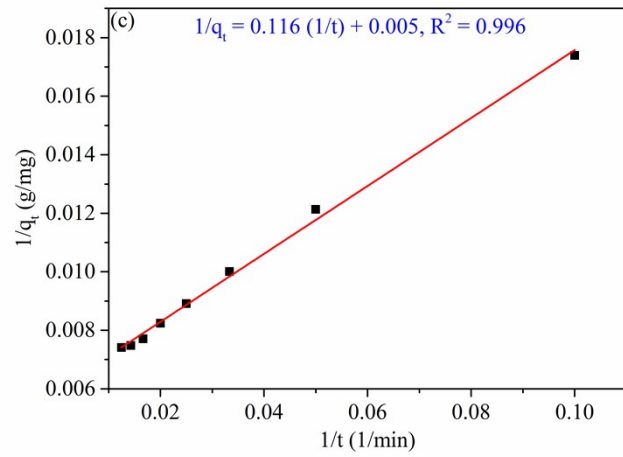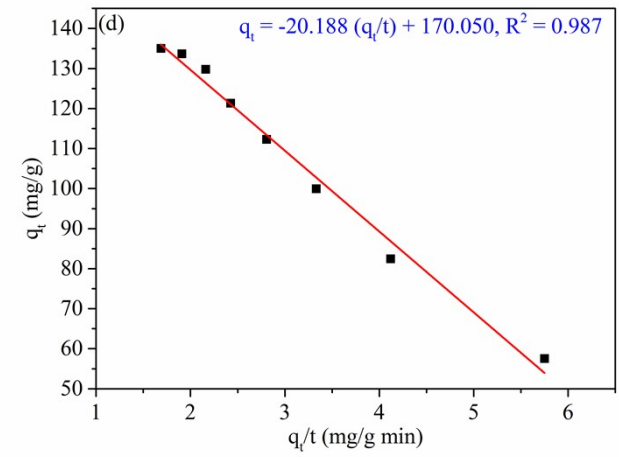

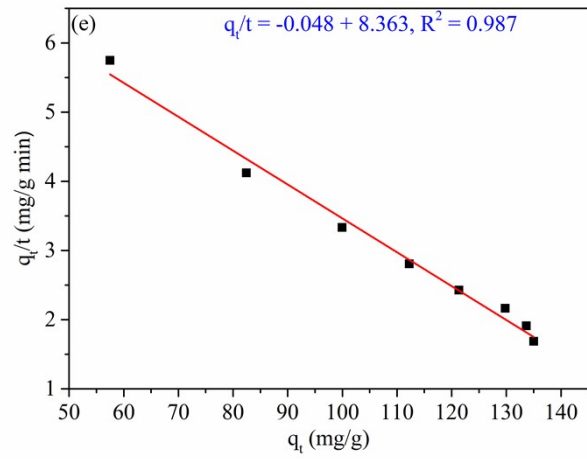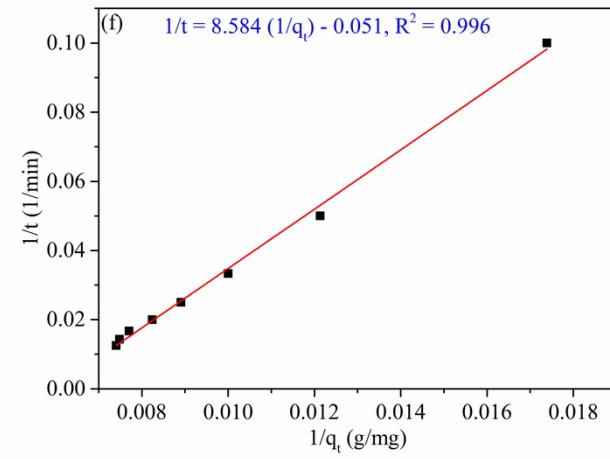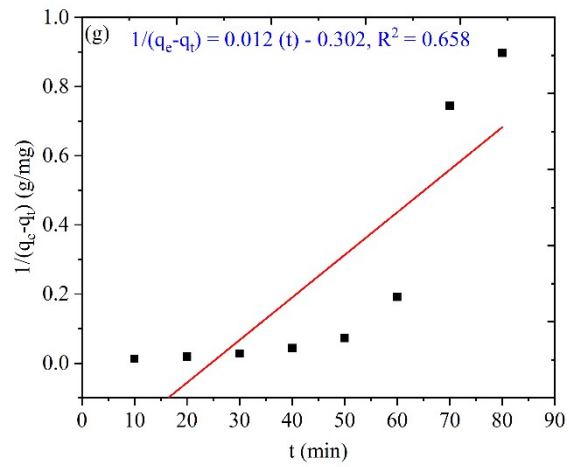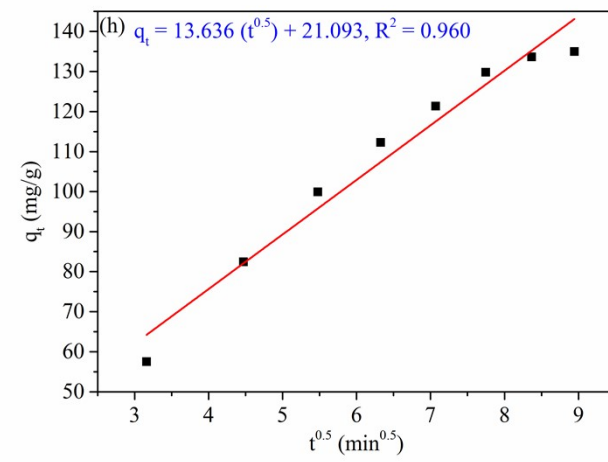

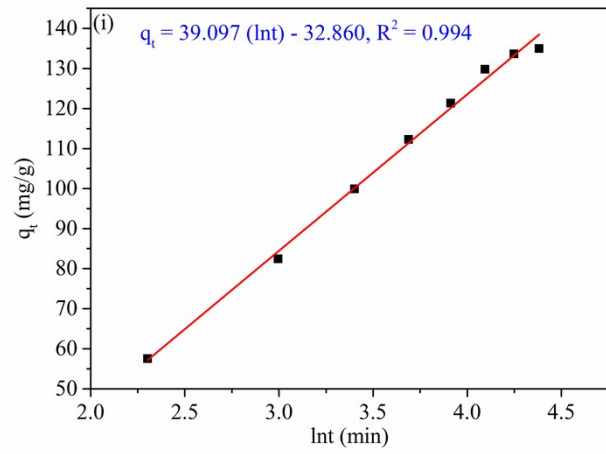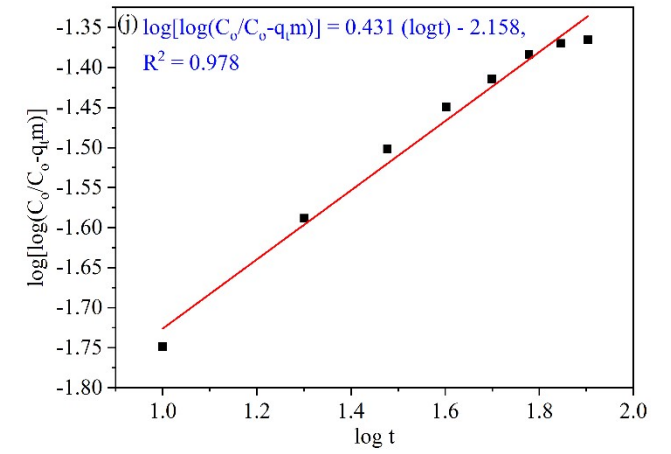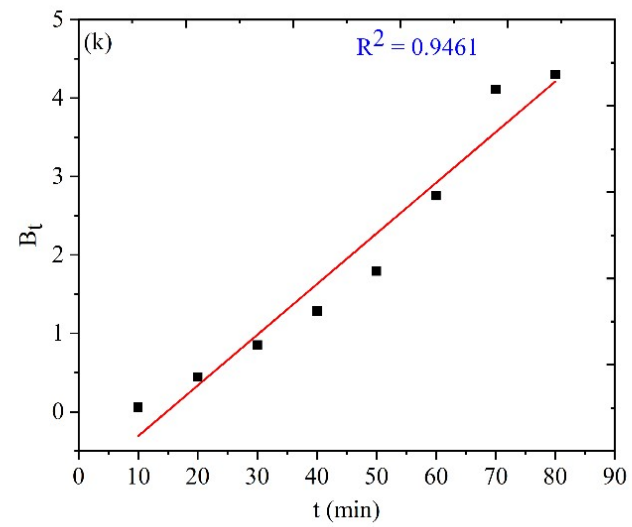

Fig.S5 Adsorption kinetics for the adsorption of dyes on: PANI/  $\text{Fe}(\text{NO}_3)_2$  (a) Pseudo-first order, (b) Type-I pseudo-second order, (c) Type-II pseudo-second order, (d) Type-III pseudo-second order, (e) Type-IV pseudo-second order, (f) Type-V pseudo-second order, (g) Type-VI pseudo-second order, (h) Intra-particle diffusion, (i) Elovich, (j) Bangham, (k) Boyd. Reaction conditions: (the initial concentration, contact time, pH, volume of solution, amount of adsorbent and temperature was 100 mg/L, (10-80) min, 4, 100 mL, 70 mg and 298K respectively).

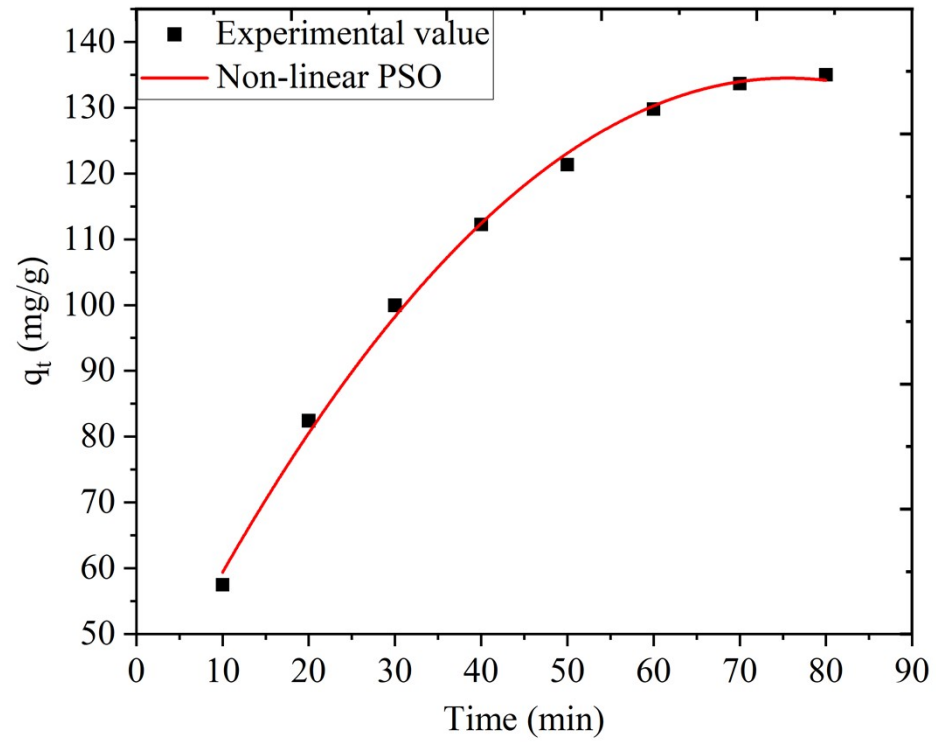

Fig.S6 PSO kinetics obtained by the nonlinear method



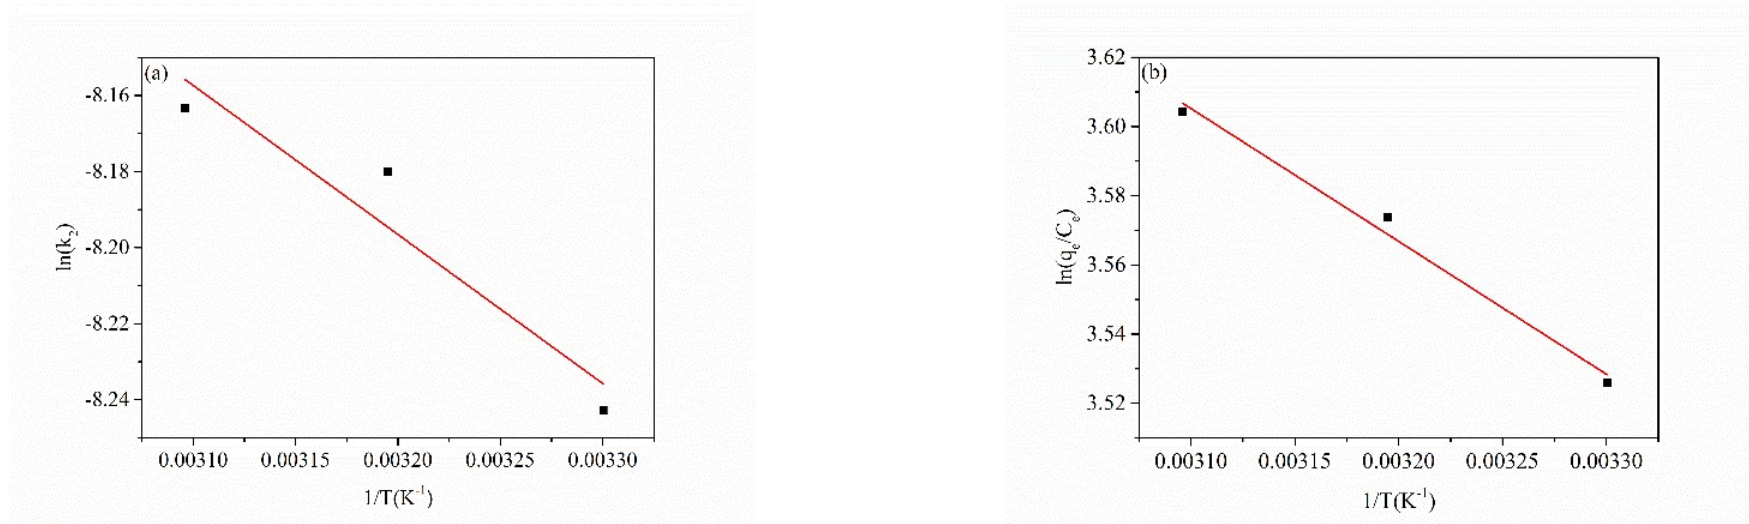

Fig.S7 (a) Arrhenius plot for the activation energy and (b) Van't Hoff regression (thermodynamics) of adsorption of RO16 dye onto PANI/ $Fe(NO_3)_2$ . (the initial concentration, contact time, volume of solution and amount of adsorbent was 100 mg/L, 80 min, 100 mL and 70 mg, respectively).

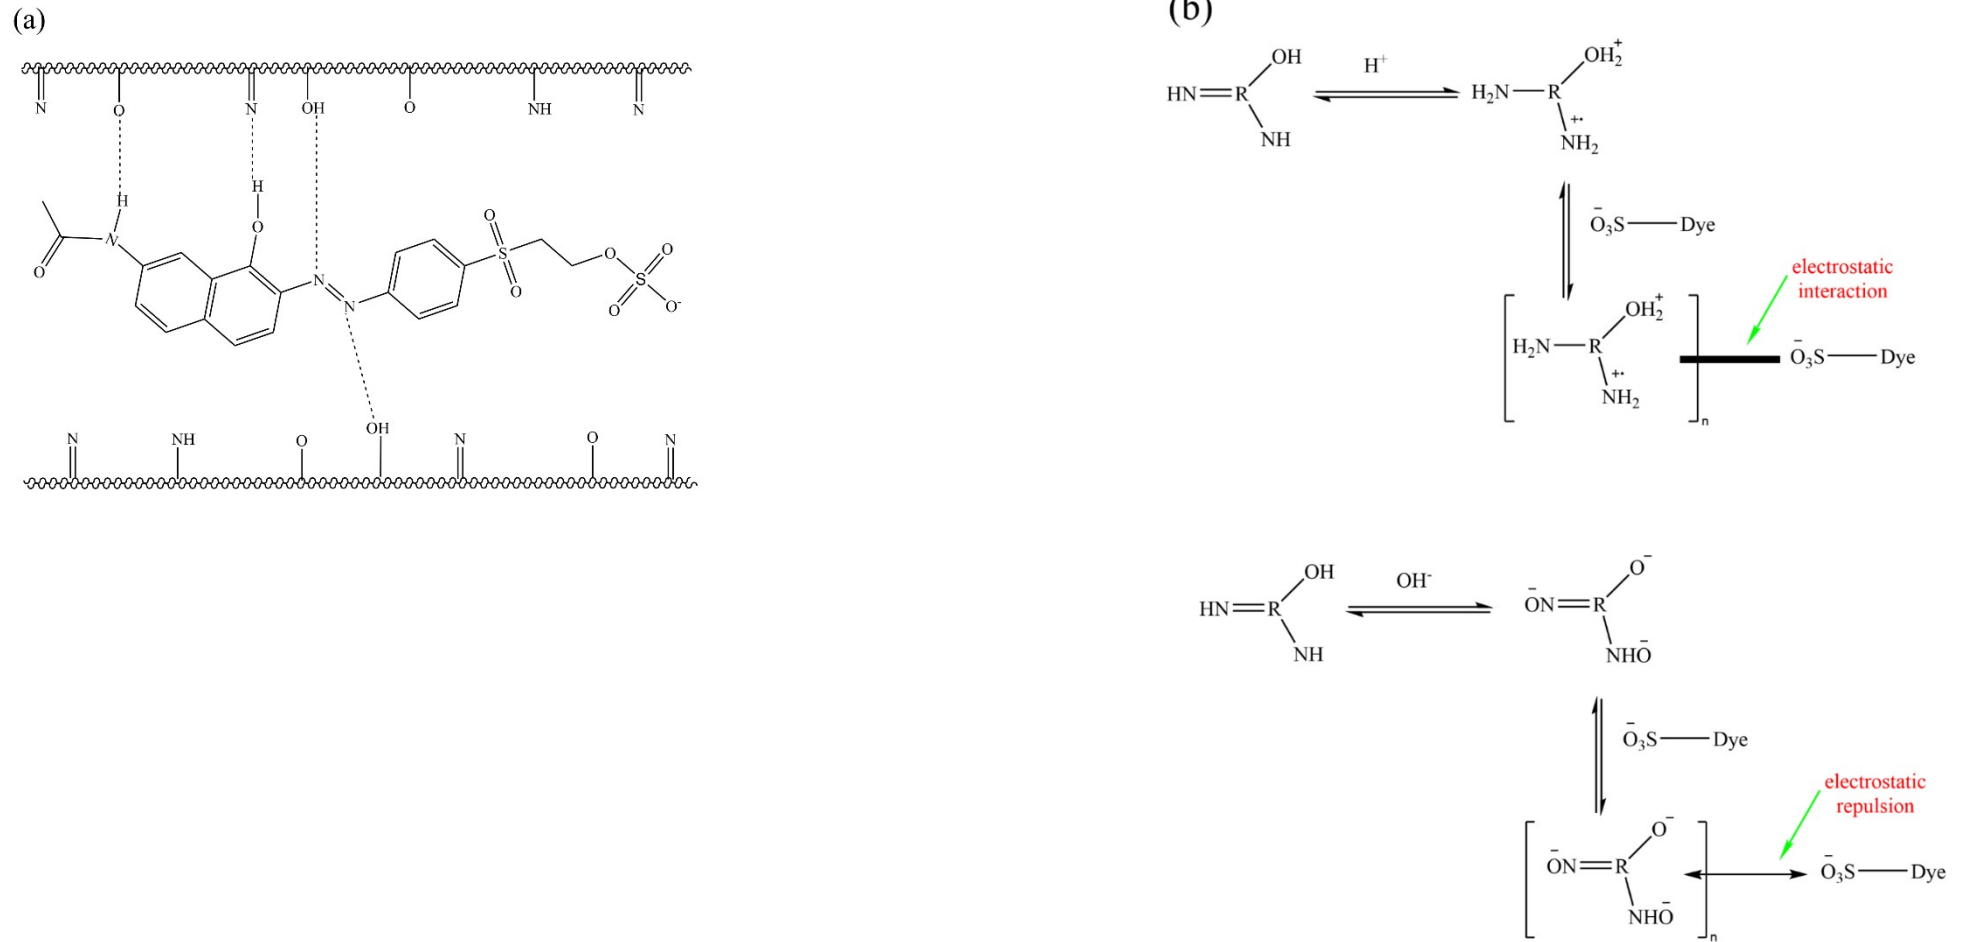

Fig.S8 (a) Proposed mechanism for the adsorption of RO16 onto PANI/  $\text{Fe}(\text{NO}_3)_2$  surface. =N, -NH, and -OH representing the functional groups present onto the PANI/  $\text{Fe}(\text{NO}_3)_2$  composite. and (b) Electrostatic interaction and repulsion.

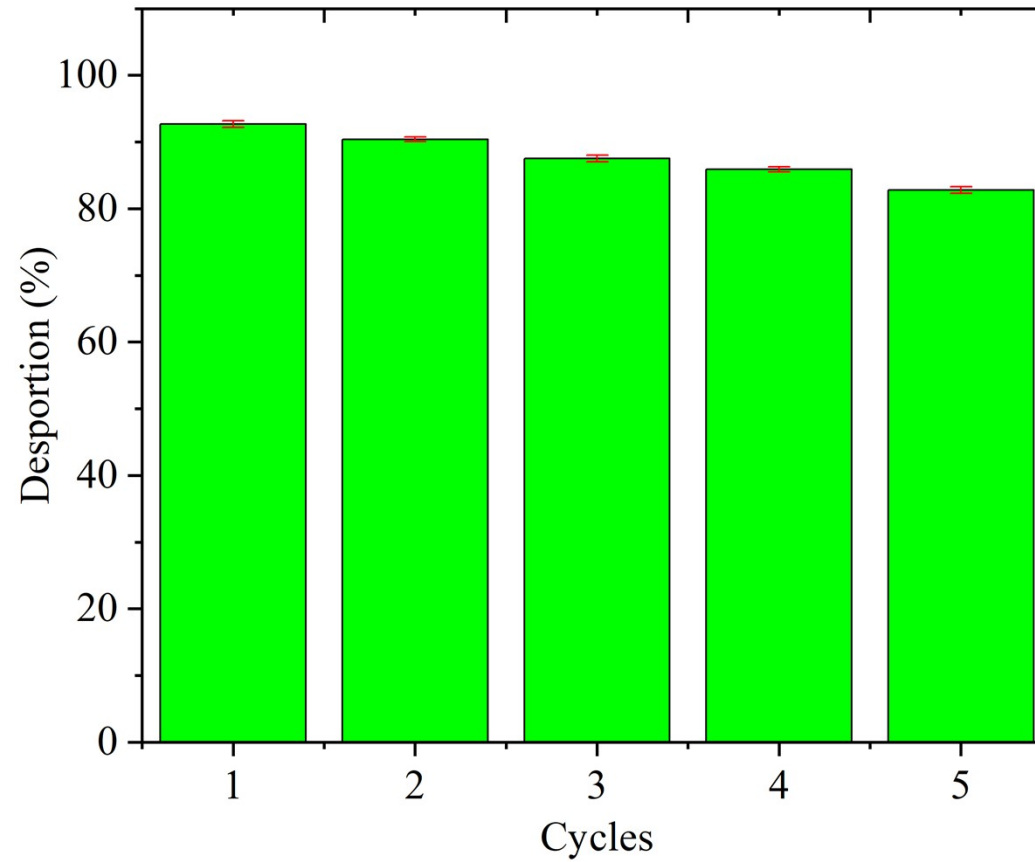

Fig.S9 Cycles of reuse (Adsorption/desorption) on the removal efficiency with PANI/  $\text{Fe}(\text{NO}_3)_2$  (the initial concentration, pH, contact time, volume of solution and amount of adsorbent was 100 mg/L, 4, 80 min, 100 mL, and 70 mg, respectively).

Table S7: The water quality parameters of different water samples

| Water Quality Parameters | Units         | Water Sample |           |             |
|--------------------------|---------------|--------------|-----------|-------------|
|                          |               | Tap water    | Raw water | Waste water |
| pH                       |               | 7.00         | 6.20      | 7.70        |
| $C_{Ca^{2+}}$            | $(mg L^{-1})$ | 12.8         | 54.3      | 12.5        |
| $C_{Mg^{2+}}$            | $(mg L^{-1})$ | 1.8          | 17.7      | 3.9         |
| $C_{Na^+}$               | $(mg L^{-1})$ | 21.5         | 186.5     | 47.5        |
| $C_{K^+}$                | $(mg L^{-1})$ | 2.3          | 20.2      | 4.7         |

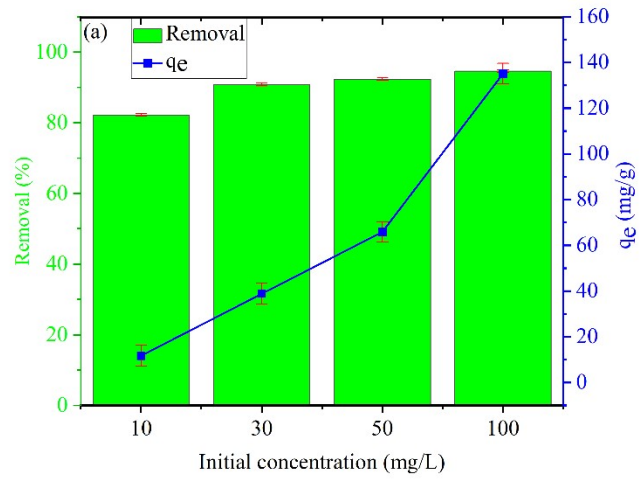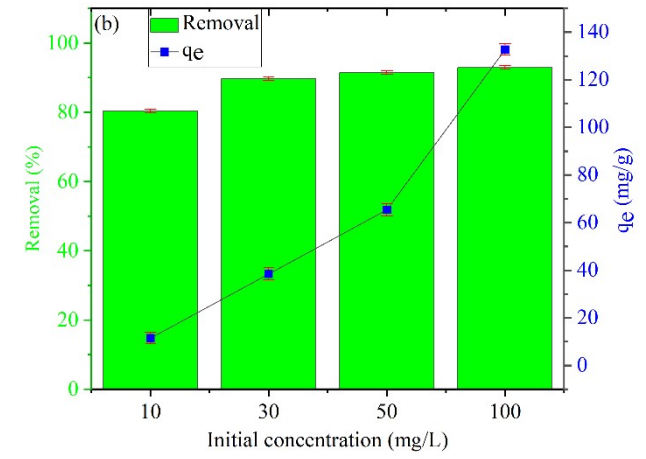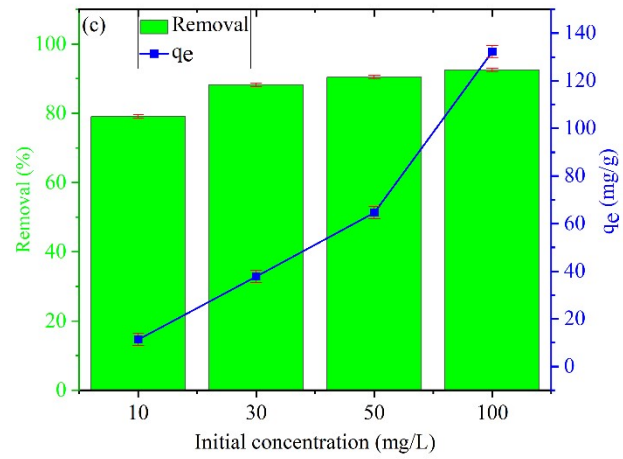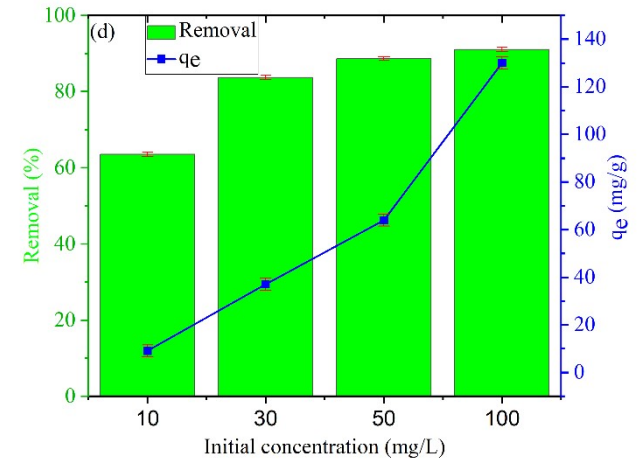

Fig.S10 Adsorption removal of RO16 dye from real water samples' PANI/  $\text{Fe}(\text{NO}_3)_2$  (the initial concentration, pH, contact time, volume of solution and amount of adsorbent was 10, 30, 50, 100 mg/L, 4, 80 min, 100 mL, and 70 mg, respectively).

**Notes and references**

1. O. Hamdaoui, F. Saoudi, M. Chiha and E. Naffrechoux, *Chem. Eng. J.*, 2008, **143**, 73-84.
2. J. Wang and X. Guo, *Chemosphere*, 2020, **258**, 127270
3. K.Y. Foo and B.H. Hameed, *Chem. Eng. J.*, 2010, **156**, 2-10.
4. G-N. Moroi, E. Avram and L. Bulgariu, *Water Air Soil Pollut.*, 2016, **227**, 260.
5. M.A. Hossain, H.H. Ngo and W. Guo, *Journal of Water Sustainability.*, 2013, **3**, 223-237.
6. Y.-T. Huang, L.-C. Lee and M.-C. Shih, *International Journal of Scientific and Research Publications.*, 2018, **8**, 509-515.
7. H. Grabi, F. Derridj, W. Lemlikchi and E. Guenin, *Sci. Rep.*, 2021, **11**, 9705
